# Supplementary material for: Urinary Metabolomic Profiling after Administration of Corydalis Tuber and Pharbitis Seed Extract in Healthy Korean Volunteers
Source: MDPI journal article supplement (doi:10.3390/pharmaceutics13040522), 2021-04-09
Supplement: s1 [file s1]

# Supplementary Materials: Urinary Metabolomic Profiling after Administration of Corydalis Tuber and Pharbitis Seed Extract in Healthy Korean Volunteers

Hyeon-Cheol Jeong, Jung Eun Park, Yohan Seo, Min-Gul Kim \* and Kwang-Hee Shin \*

(a)

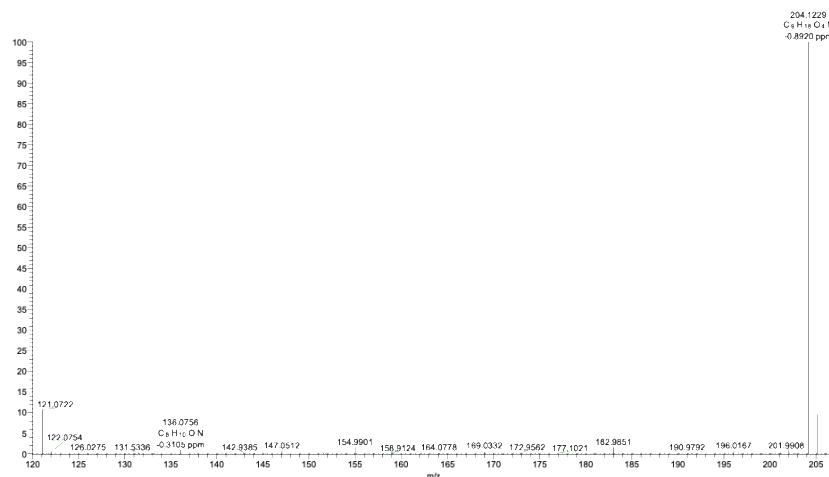

L-acetylcarnitine standard

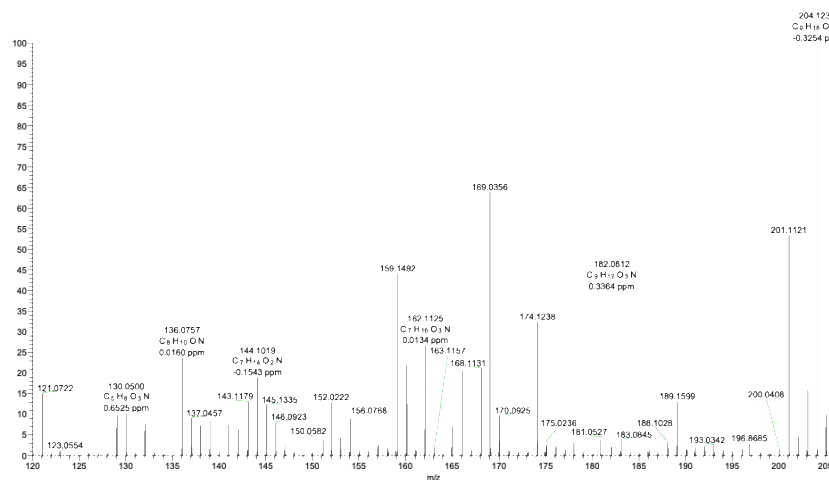

Urinary L-acetylcarnitine

(b)

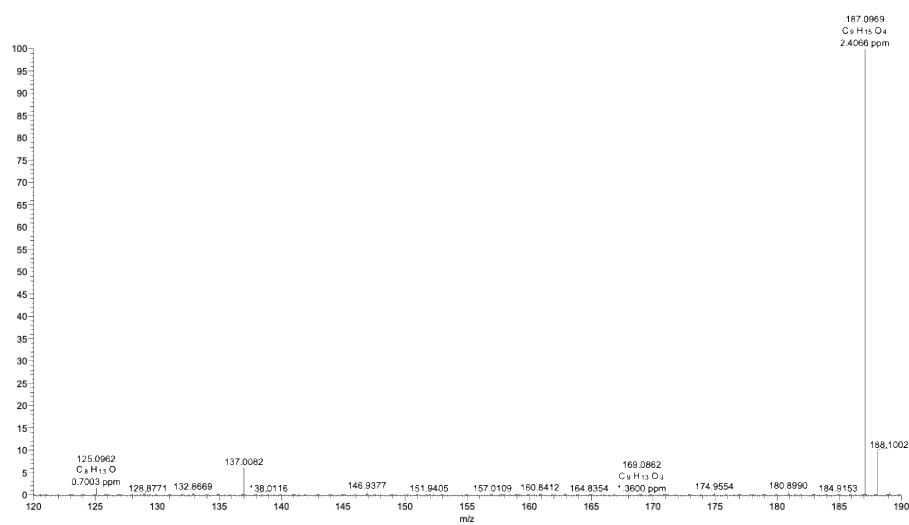

Azelaic acid standard

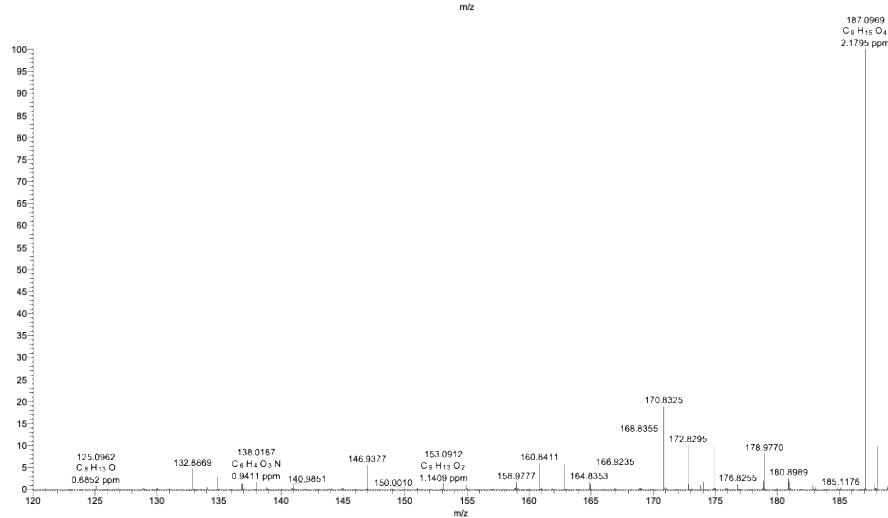

Urinary azelaic acid

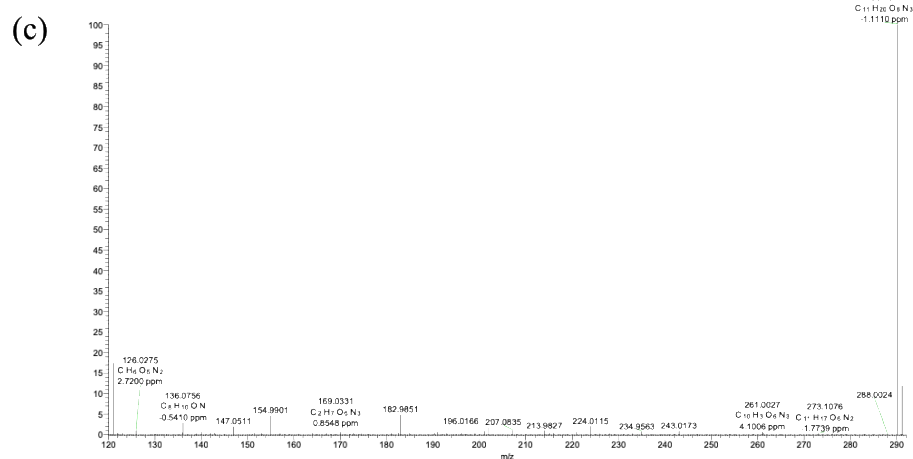

Ophthalmic acid standard

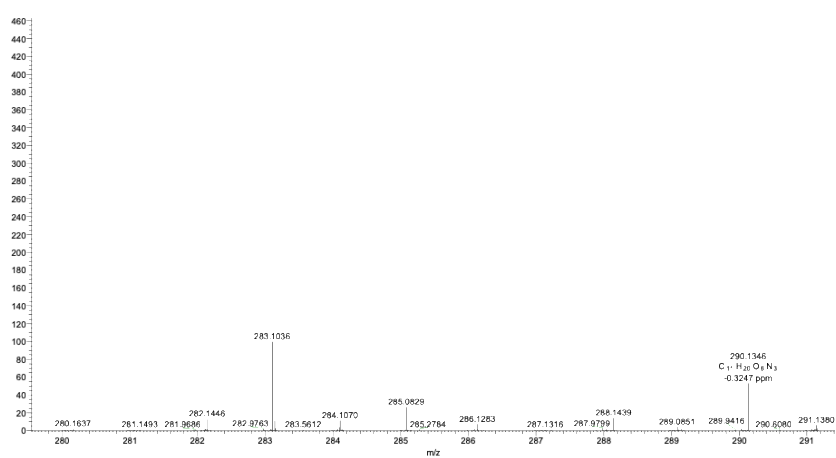

Urinary ophthalmic acid

(d)

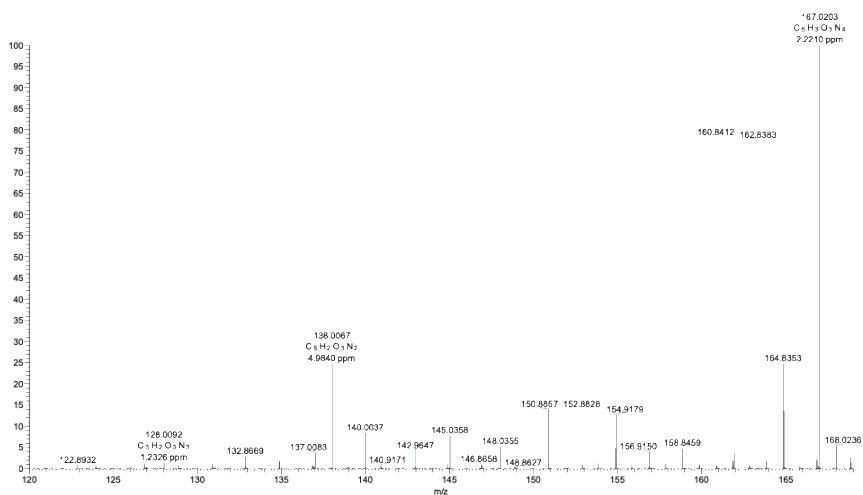

Uric acid standard

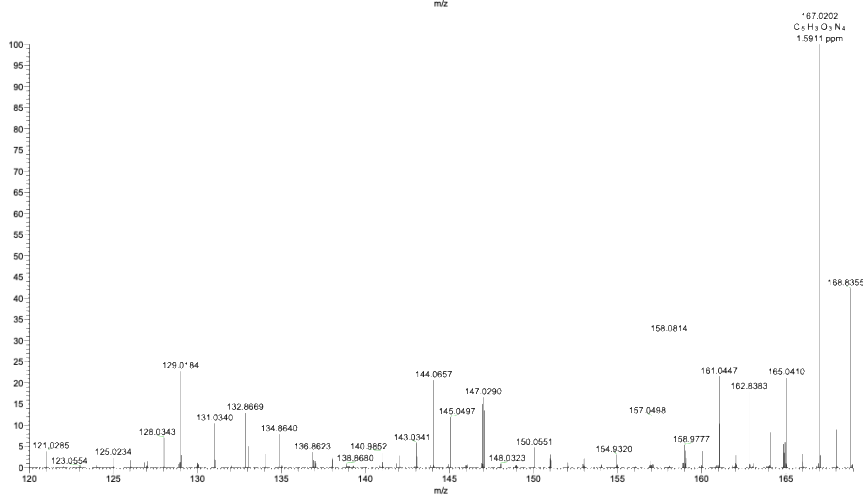

Urinary uric acid

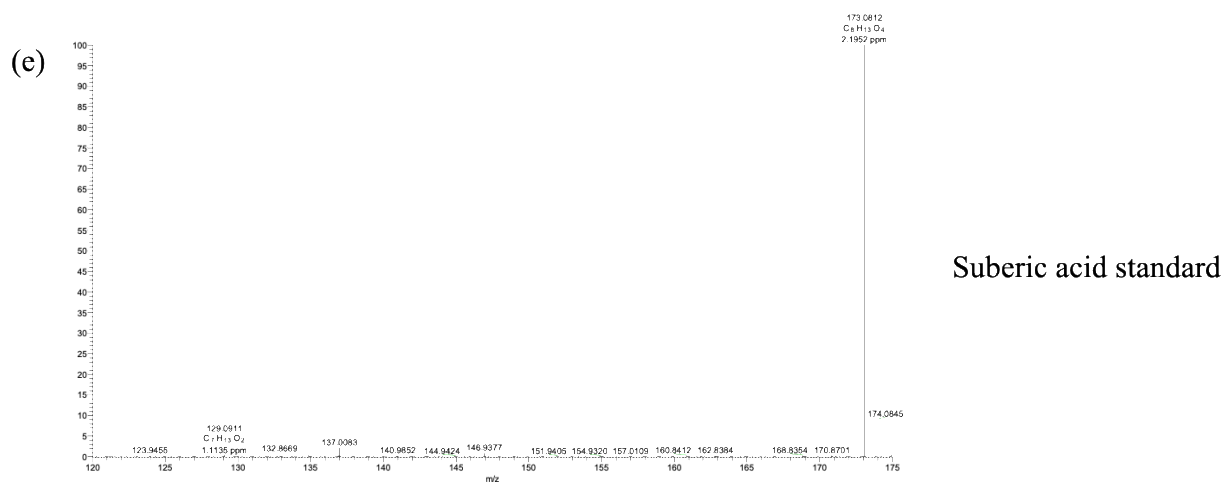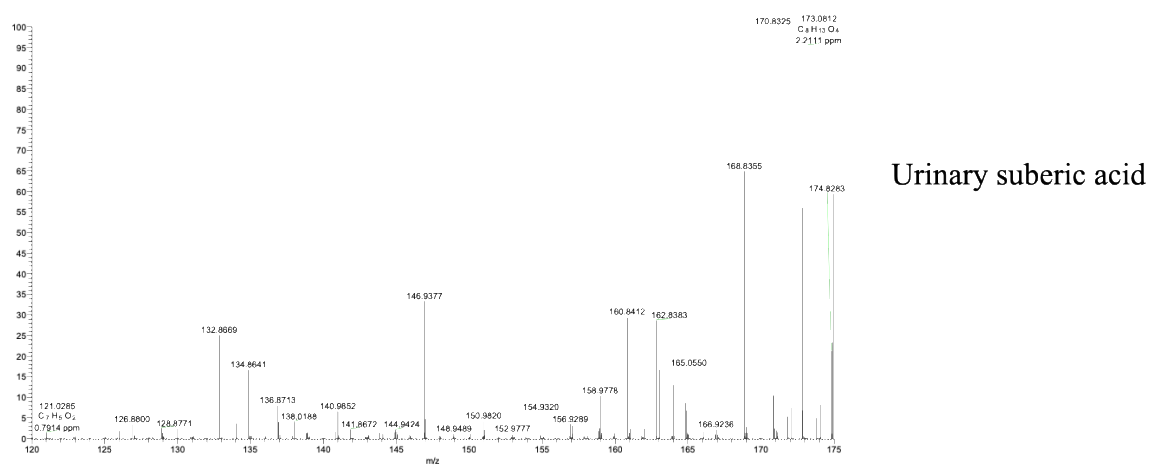

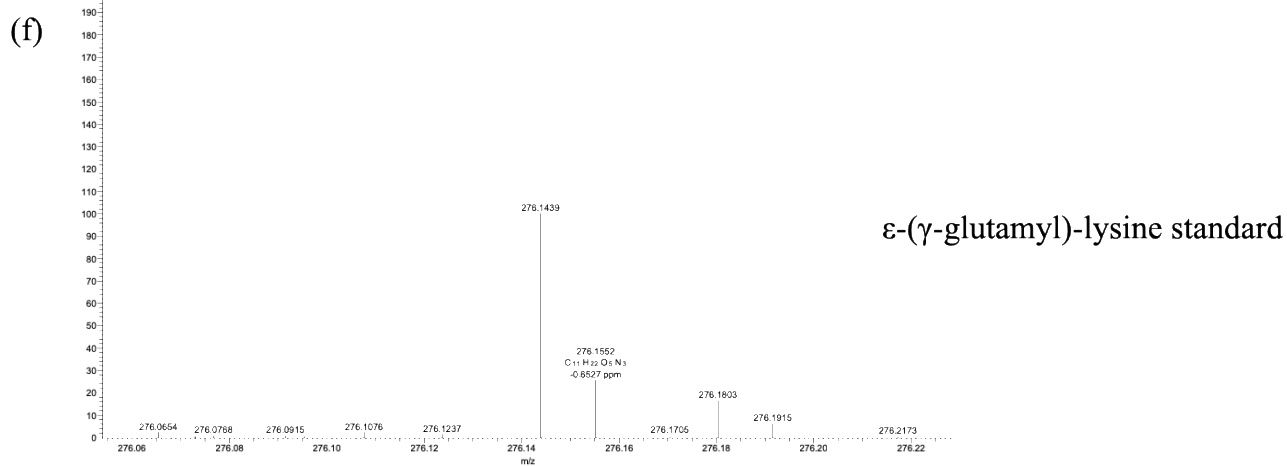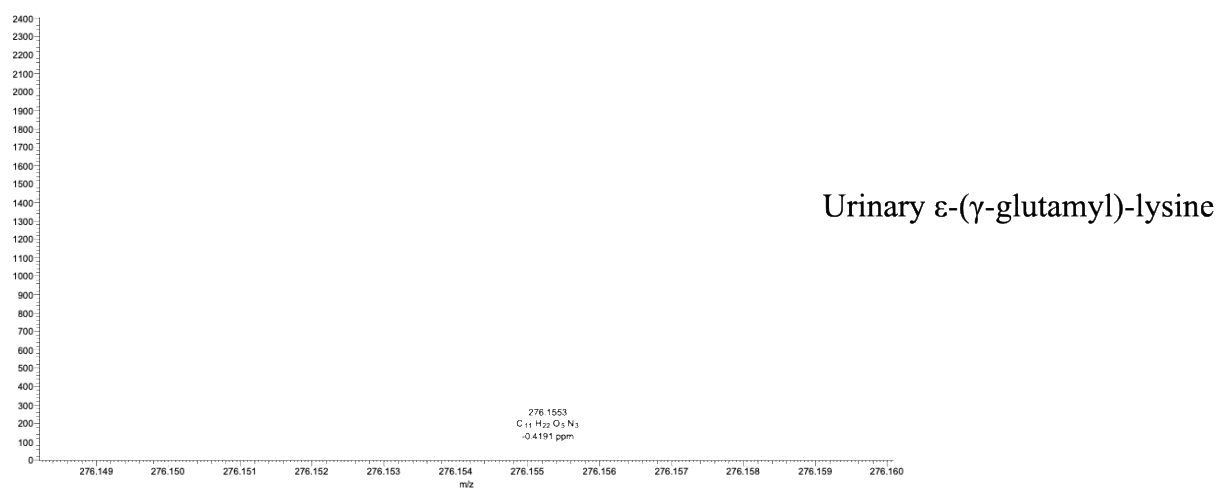

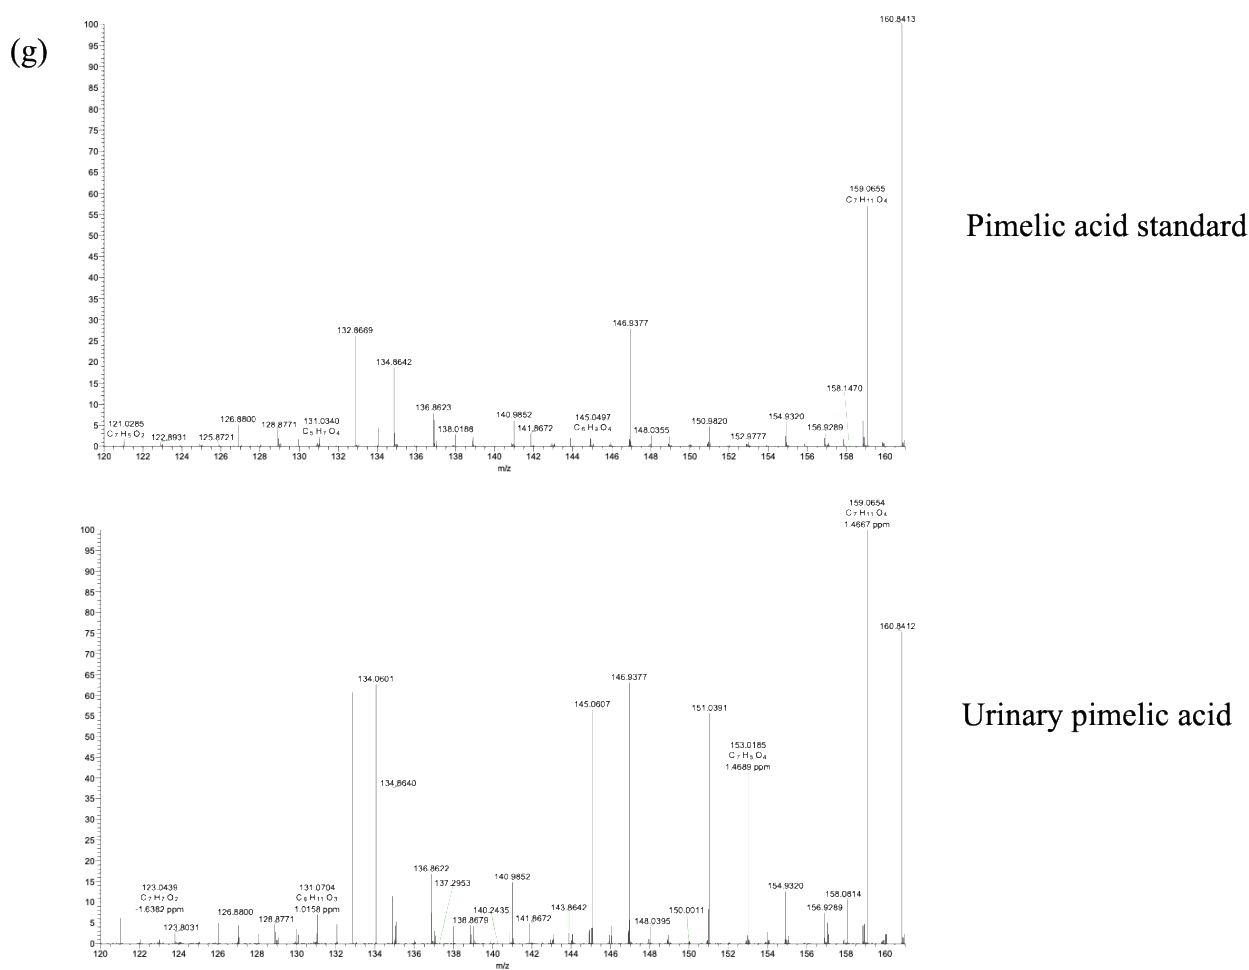

**Figure S1.** Mass spectra of the selected seven candidates and comparison with standard compounds: (a) L-acetylcarnitine, (b) azelaic acid, (c) ophthalmic acid, (d) uric acid, (e) suberic acid, (f)  $\epsilon$ -( $\gamma$ -glutamyl)-lysine, and (g) pimelic acid.
